# Supplementary material
Source: PubMed Central journal article supplement (PMC5317386)
Supplement: supp_WNL.0000000000003615_Coinvestigators.pdf [file supp_WNL.0000000000003615_Coinvestigators.pdf]

## **Co-investigators: Alzheimer's Disease Neuroimaging Initiative (ADNI) Leadership and Infrastructure**

Michael W. Weiner, MD (UC San Francisco, Principal Investigator, Initial Concept Planning & Development, Early Project Proposal Development); Paul Aisen, MD (University of Southern California, ADCS PI and Director of Coordinating Center Clinical Core); Robert C. Green, MD, MPH (BWH/HMS, Chair, Data and Publications Committee); Tom Montine, MD, PhD (University of Washington, Chair, Resource Allocation Review Committee); Ronald Petersen, MD, PhD (Mayo Clinic, Rochester, Clinical Core PI); Ronald G. Thomas, PhD (UC San Diego, Clinical Informatics and Operations); Michael Donohue, PhD (UC San Diego, Clinical Informatics and Operations); Sarah Walter, MSc (UC San Diego, Clinical Informatics and Operations); Devon Gessert (UC San Diego, Clinical Informatics and Operations); Tamie Sather, MA (UC San Diego, Clinical Informatics and Operations); Gus Jiminez, MBS (UC San Diego, Clinical Informatics and Operations); Archana B. Balasubramanian, PhD (UC San Diego, Clinical Informatics and Operations); Jennifer Mason, MPH (UC San Diego, Clinical Informatics and Operations); Iris Sim (UC San Diego, Clinical Informatics and Operations); Laurel Beckett, PhD (UC Davis, Biostatistics Core PI); Danielle Harvey, PhD (UC Davis, Biostatistics Core); Michael Donohue, PhD (UC San Diego, Biostatistics Core); Clifford R. Jack, Jr., MD (Mayo Clinic, Rochester, MRI Core PI); Matthew Bernstein, PhD (Mayo Clinic, Rochester, MRI Core); Nick Fox, MD (Mayo Clinic, Rochester, MRI Core); Paul Thompson, PhD (University of Southern California, MRI Core); Norbert Schuff, PhD (UCSF MRI, MRI Core); Charles DeCarli, MD (UC Davis, MRI Core); Bret Borowski, RT (Mayo Clinic, MRI Core); Jeff Gunter, PhD (Mayo Clinic, MRI Core); Matt Senjem, MS (Mayo Clinic, MRI Core); Prashanthi Vemuri, PhD (Mayo Clinic, MRI Core); David Jones, MD (Mayo Clinic, MRI Core); Kejal Kantarci (Mayo Clinic, MRI Core); Chad Ward (Mayo Clinic, MRI Core); William Jagust, MD UC Berkeley (PET Core PI); Robert A. Koeppe, PhD (University of Michigan, PET Core); Norm Foster, MD (University of Utah, PET Core); Eric M. Reiman, MD (Banner Alzheimer's Institute, PET Core); Kewei Chen, PhD (Banner Alzheimer's Institute, PET Core); Chet Mathis, MD (University of Pittsburgh, PET Core); Susan Landau, PhD (UC Berkeley, PET Core); John C. Morris, MD (Washington University St. Louis, Neuropathology Core); Nigel J. Cairns, PhD, FRCPath (Washington University St. Louis, Neuropathology Core); Erin Franklin, MS, CCRP (Washington University St. Louis, Neuropathology Core); Lisa Taylor-Reinwald, BA, HTL (Washington University St. Louis, Neuropathology Core); Leslie M. Shaw, PhD (UPenn School of Medicine, Biomarkers Core); John Q. Trojanowki, MD, PhD (UPenn School of Medicine, Biomarkers Core); Virginia Lee, PhD, MBA (UPenn School of Medicine, Biomarkers Core); Magdalena Korecka, PhD (UPenn School of Medicine, Biomarkers Core); Michal Figurski, PhD (UPenn School of Medicine, Biomarkers Core); Arthur W. Toga, PhD (USC, Informatics Core PI); Karen Crawford (USC, Informatics Core); Scott Neu, PhD (USC, Informatics Core); Andrew J. Saykin, PsyD (Indiana University, Genetics Core); Tatiana M. Foroud, PhD (Indiana University, Genetics Core); Steven Potkin, MD (UC Irvine, Genetics Core); Li Shen, PhD (Indiana University, Genetics Core); Kelley Faber, MS, CCRC (Indiana University, Genetics Core); Sungeun Kim, PhD (Indiana University, Genetics Core); Kwangsik Nho, PhD (Indiana University, Genetics Core); Lean Thal, MD (UC San Diego, Initial Concept Planning & Development, Early Project Proposal Development); Zaven Khachaturian, PhD (Prevent Alzheimer's Disease 2020, Initial Concept Planning & Development, Early Project Proposal Development); Neil Buckholtz (National Institute on Aging, Early Project Proposal Development); Peter J. Snyder, PhD (Brown University, Early Project Proposal Development); William Potter, MD (National Institute of Mental Health, Early Project Proposal Development); Steven Paul, MD (Cornell University, Early Project Proposal Development); Marilyn Albert, PhD (Johns Hopkins University, Early Project Proposal Development); Richard Frank, MD, PhD (Richard Frank Consulting, Early Project Proposal Development); John Hsiao, MD (National Institute on Aging).
